# Supplementary material for: Improved nanoformulation and bio-functionalization of linear-dendritic block copolymers with biocompatible ionic liquids
Source: Royal Society of Chemistry journal article supplement (doi:10.1039/d2nr00538g), 2022-01-01
Supplement: d2nr00538g1.pdf [file d2nr00538g1.pdf]

### Supplementary Figure 1

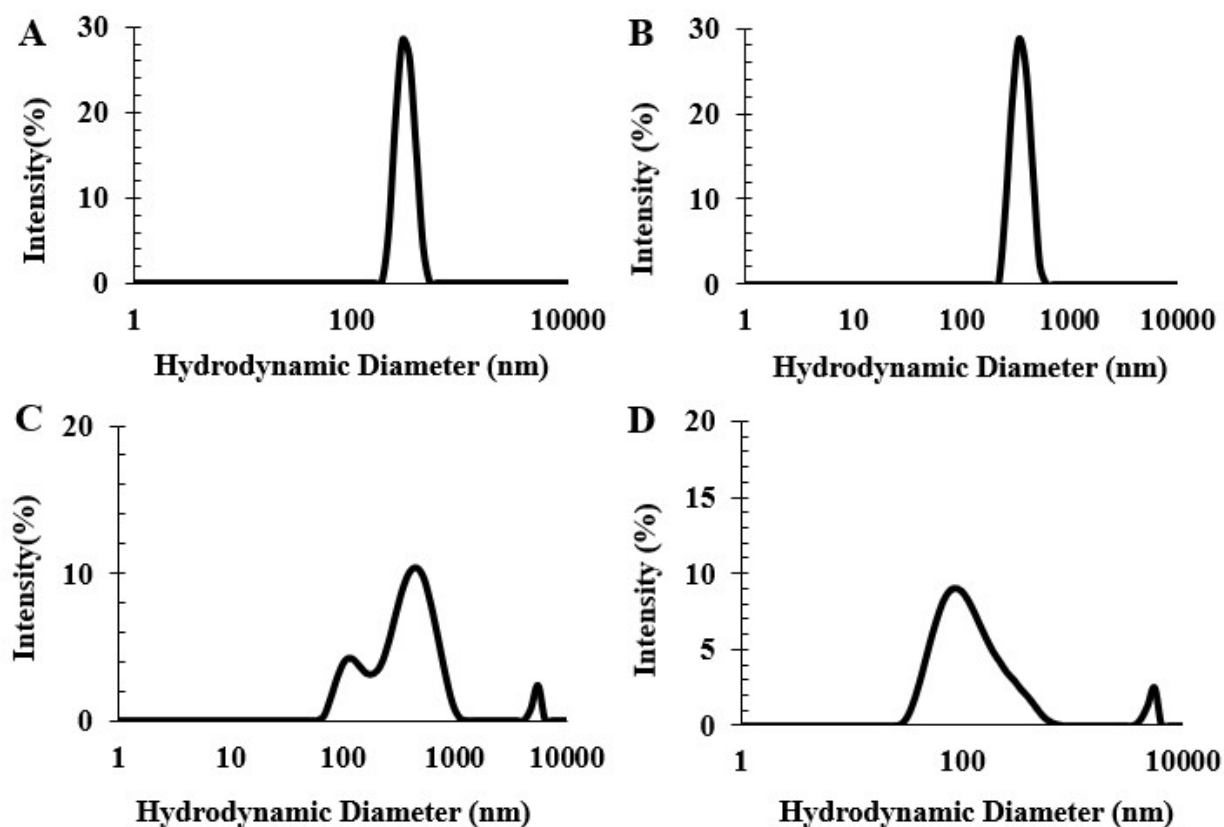

**Figure S1. Representative stability curves (from n=3) show that IL-LDBC's have a shelf-life in solution up to 3 weeks.** Dynamic Light Scattering (DLS) hydrodynamic diameter measurements of A) IL-LDBC's during the first week of synthesis, B.) 2 weeks after synthesis, C.) 3 weeks after synthesis, and D.) 4 weeks after synthesis.
